# Supplementary material for: Tautomerism of Guanine Analogues
Source: PubMed Central journal article supplement (PMC7072560; doi:10.3390/biom10020170), 2020-01-22
Supplement: biomolecules-10-00170-s001.pdf [file biomolecules-10-00170-s001.pdf]

# Tautomerism of guanosine analogues

Jakub Radek Štoček<sup>1</sup> and Martin Dračinský<sup>1,\*</sup>

<sup>1</sup> Institute of Organic Chemistry and Biochemistry, Czech Academy of Sciences, Flemingovo nám. 2, 166 10, Prague, Czech Republic.

\* Correspondence: dracinsky@uochb.cas.cz

## Supporting Information

**Table S1.** Relative energies (kJ/mol) of four tautomers of compounds **1–11** calculated at B3LYP/6-311++G(2df,2pd) level.

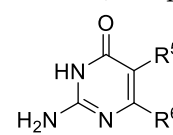

|           | R <sup>5</sup>  | R <sup>6</sup>  | 2,3-I<br>(keto) | 1,2-I<br>(keto) | 2,4-I<br>(enol) | 1,3-I<br>(imino) <sup>a</sup> | 1,3-I<br>(imino) <sup>b</sup> |
|-----------|-----------------|-----------------|-----------------|-----------------|-----------------|-------------------------------|-------------------------------|
| <b>1</b>  | H               | H               | 0.0             | 13.9            | 20.7            | 23.3                          | 24.4                          |
| <b>2</b>  | CH <sub>3</sub> | H               | 0.0             | 12.0            | 30.5            | 23.8                          | 24.5                          |
| <b>3</b>  | <i>t</i> -butyl | H               | 0.0             | 12.8            | 22.0            | 22.3                          | 23.1                          |
| <b>4</b>  | NH <sub>2</sub> | H               | 0.0             | 6.5             | 25.9            | 29.8                          | 29.6                          |
| <b>5</b>  | CF <sub>3</sub> | H               | 0.0             | 16.3            | 24.3            | 28.7                          | 30.3                          |
| <b>6</b>  | NO <sub>2</sub> | H               | 0.0             | 24.9            | 24.6            | 34.8                          | 37.5                          |
| <b>7</b>  | H               | CH <sub>3</sub> | 0.0             | 12.6            | 28.2            | 21.3                          | 22.4                          |
| <b>8</b>  | H               | <i>t</i> -butyl | 0.0             | 12.8            | 27.8            | 22.3                          | 23.6                          |
| <b>9</b>  | H               | NH <sub>2</sub> | 0.0             | 34.8            | 28.0            | 36.7                          | 38.8                          |
| <b>10</b> | H               | CF <sub>3</sub> | 0.0             | 32.3            | 29.0            | 45.3                          | 46.6                          |
| <b>11</b> | H               | NO <sub>2</sub> | 0.0             | 32.5            | 20.0            | 49.1                          | 49.8                          |

<sup>a</sup>Imino hydrogen heading towards H3; <sup>b</sup>imino hydrogen heading towards N1

**Table S2.** Relative energies (kJ/mol) of four tautomers of bicyclic compounds **12–17** calculated at B3LYP/6-311++G(2df,2pd) level.

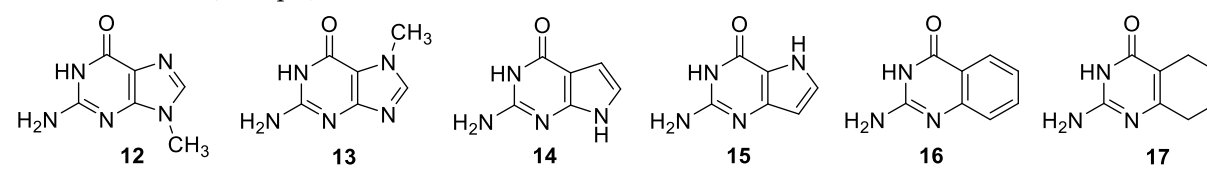

|           | 2,3-I<br>(keto) | 1,2-I<br>(keto) | 2,4-I<br>(enol) | 1,3-I<br>(imino) <sup>a</sup> | 1,3-I<br>(imino) <sup>b</sup> |
|-----------|-----------------|-----------------|-----------------|-------------------------------|-------------------------------|
| <b>12</b> | 0.0             | 41.0            | 33.8            | 49.0                          | 50.1                          |
| <b>13</b> | 0.0             | 17.2            | 34.3            | 32.8                          | 32.6                          |
| <b>14</b> | 0.0             | 38.5            | 38.3            | 45.1                          | 45.9                          |
| <b>15</b> | 0.0             | 11.5            | 48.7            | 27.5                          | 27.3                          |
| <b>16</b> | 0.0             | 8.5             | 46.8            | 20.4                          | 20.1                          |
| <b>17</b> | 0.0             | 10.8            | 30.6            | 21.0                          | 21.7                          |

<sup>a</sup>Imino hydrogen heading towards H3; <sup>b</sup>imino hydrogen heading towards N1

**Table S3.** Relative energies (kJ/mol) of four tautomers of compounds **1–11** calculated at B3LYP/6-31+G(d,p) level.

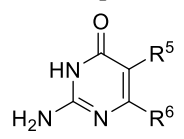

|           | R <sup>5</sup>  | R <sup>6</sup>  | 2,3-I<br>(keto) | 1,2-I<br>(keto) | 2,4-I<br>(enol) | 1,3-I<br>(imino) <sup>a</sup> | 1,3-I<br>(imino) <sup>b</sup> |
|-----------|-----------------|-----------------|-----------------|-----------------|-----------------|-------------------------------|-------------------------------|
| <b>1</b>  | H               | H               | 0.00            | 21.5            | 15.5            | 26.2                          | 27.8                          |
| <b>2</b>  | CH <sub>3</sub> | H               | 0.00            | 19.2            | 29.0            | 26.9                          | 27.9                          |
| <b>3</b>  | <i>t</i> -butyl | H               | 0.00            | 19.1            | 33.2            | 25.58                         | 26.7                          |
| <b>4</b>  | NH <sub>2</sub> | H               | 0.00            | 12.9            | 22.1            | 33.1                          | 32.8                          |
| <b>5</b>  | CF <sub>3</sub> | H               | 0.00            | 20.2            | 22.7            | 30.5                          | 32.6                          |
| <b>6</b>  | NO <sub>2</sub> | H               | 0.00            | 32.3            | 21.2            | 37.0                          | 40.6                          |
| <b>7</b>  | H               | CH <sub>3</sub> | 0.00            | 19.5            | 25.0            | 24.0                          | 25.5                          |
| <b>8</b>  | H               | <i>t</i> -butyl | 0.00            | 21.4            | 24.5            | 26.4                          | 28.2                          |
| <b>9</b>  | H               | NH <sub>2</sub> | 0.00            | 41.1            | 23.4            | 39.4                          | 42.0                          |
| <b>10</b> | H               | CF <sub>3</sub> | 0.00            | 36.0            | 26.3            | 44.3                          | 45.9                          |
| <b>11</b> | H               | NO <sub>2</sub> | 0.00            | 37.6            | 15.4            | 50.0                          | 51.0                          |

<sup>a</sup>Imino hydrogen heading towards H3; <sup>b</sup>imino hydrogen heading towards N1

**Table S4.** Relative energies (kJ/mol) of four tautomers of bicyclic compounds **12–17** calculated at B3LYP/6-31+G(d,p) level.

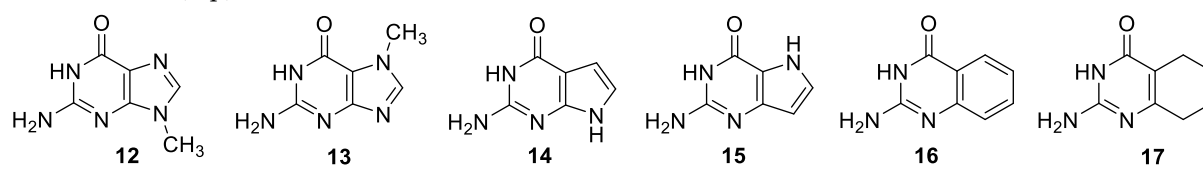

|           | 2,3-I<br>(keto) | 1,2-I<br>(keto) | 2,4-I<br>(enol) | 1,3-I<br>(imino) <sup>a</sup> | 1,3-I<br>(imino) <sup>b</sup> |
|-----------|-----------------|-----------------|-----------------|-------------------------------|-------------------------------|
| <b>12</b> | 0.0             | 49.6            | 30.5            | 53.1                          | 54.4                          |
| <b>13</b> | 0.0             | 21.2            | 31.2            | 34.3                          | 34.0                          |
| <b>14</b> | 0.0             | 46.4            | 36.2            | 48.8                          | 49.8                          |
| <b>15</b> | 0.0             | 17.8            | 47.6            | 30.1                          | 29.8                          |
| <b>16</b> | 0.0             | 14.7            | 48.6            | 23.0                          | 22.8                          |
| <b>17</b> | 0.0             | 17.4            | 29.6            | 24.0                          | 25.0                          |

<sup>a</sup>Imino hydrogen heading towards H3; <sup>b</sup>imino hydrogen heading towards N1

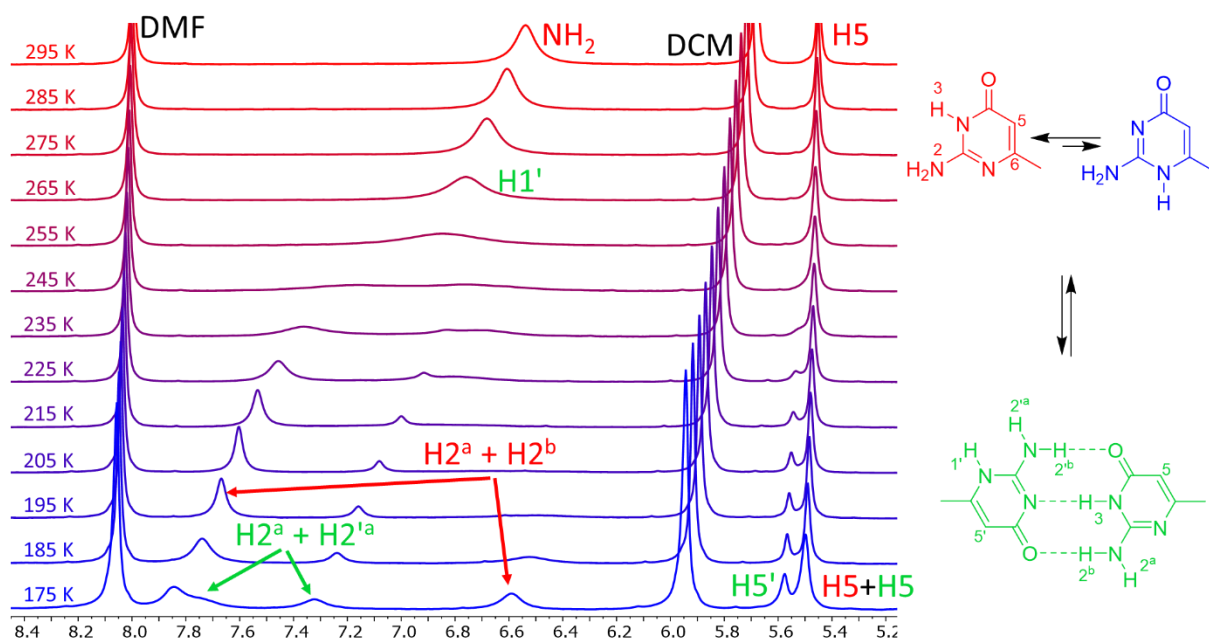

**Figure S1.** H5 and NH<sub>2</sub> region of variable-temperature <sup>1</sup>H NMR spectra of compound **7** in a 3:1 mixture of DMF-*d*<sub>7</sub> and CD<sub>2</sub>Cl<sub>2</sub>.

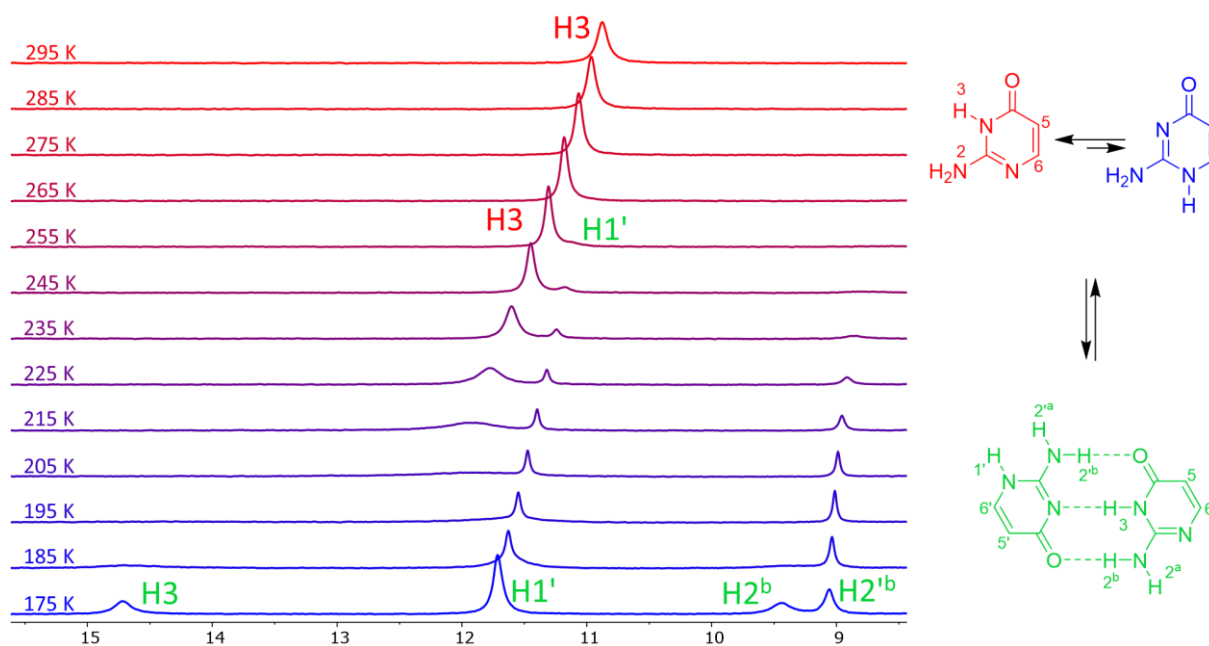

**Figure S2.** Low-field region of variable-temperature <sup>1</sup>H NMR spectra of compound **1** in a 3:1 mixture of DMF-*d*<sub>7</sub> and CD<sub>2</sub>Cl<sub>2</sub>.

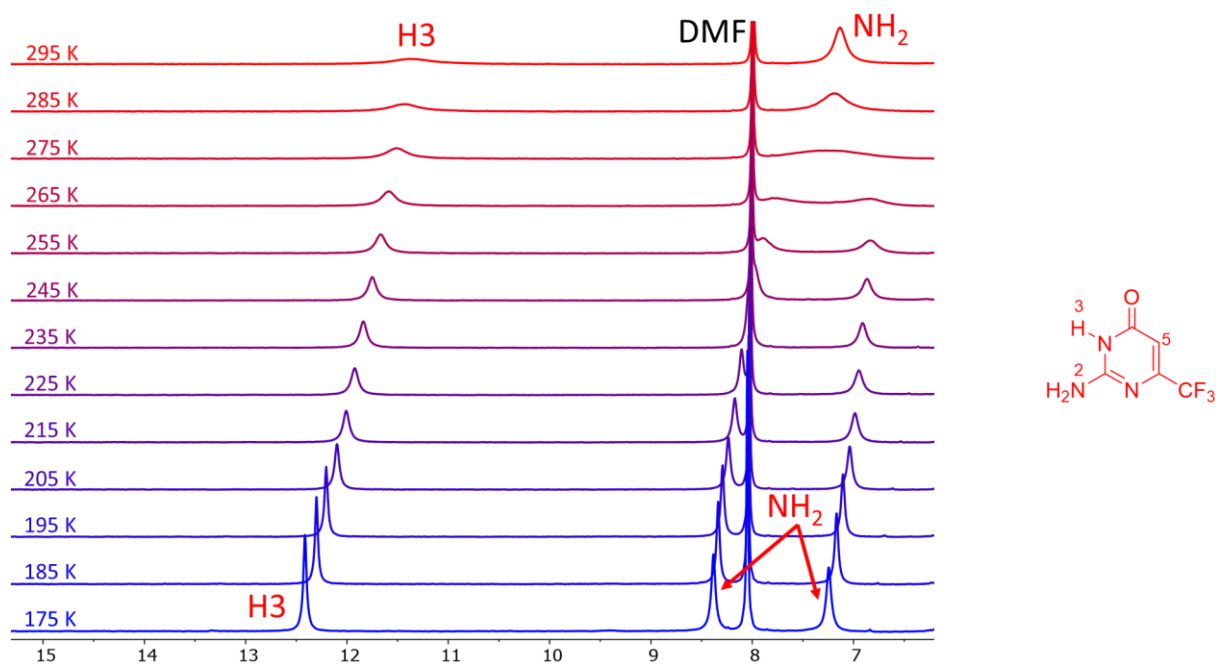

**Figure S3.** Low-field region of variable-temperature  $^1\text{H}$  NMR spectra of compound **10** in a 3:1 mixture of  $\text{DMF-}d_7$  and  $\text{CD}_2\text{Cl}_2$ .

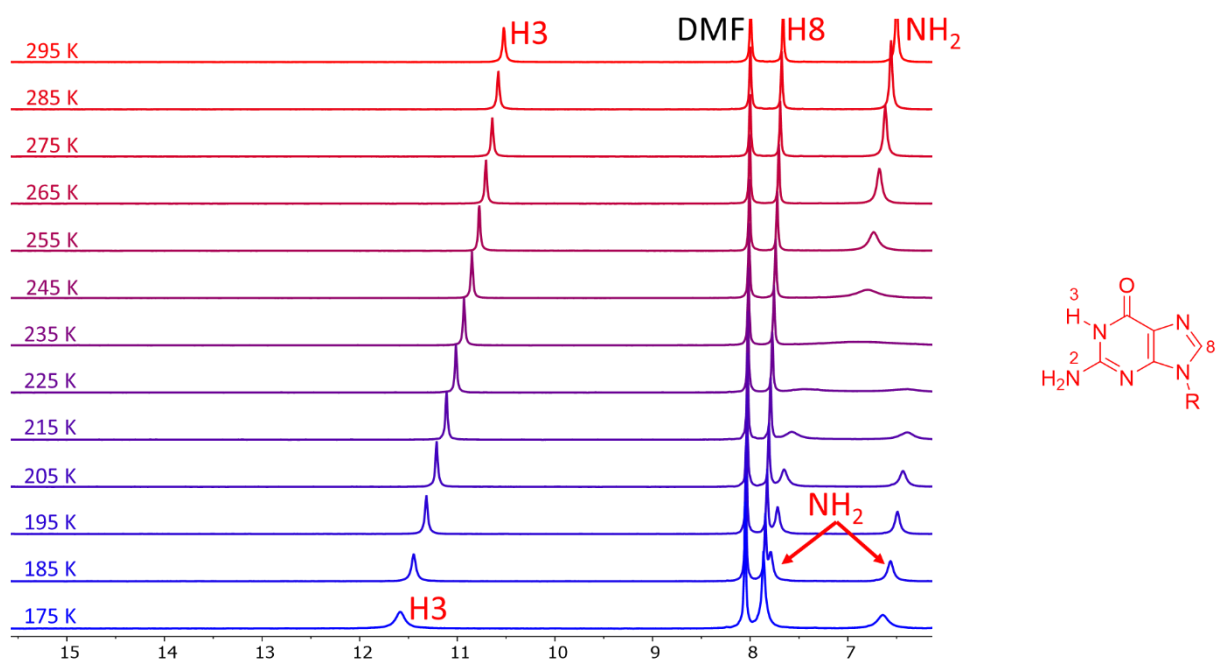

**Figure S4.** Low-field region of variable-temperature  $^1\text{H}$  NMR spectra of compound **18** in a 3:1 mixture of  $\text{DMF-}d_7$  and  $\text{CD}_2\text{Cl}_2$ .

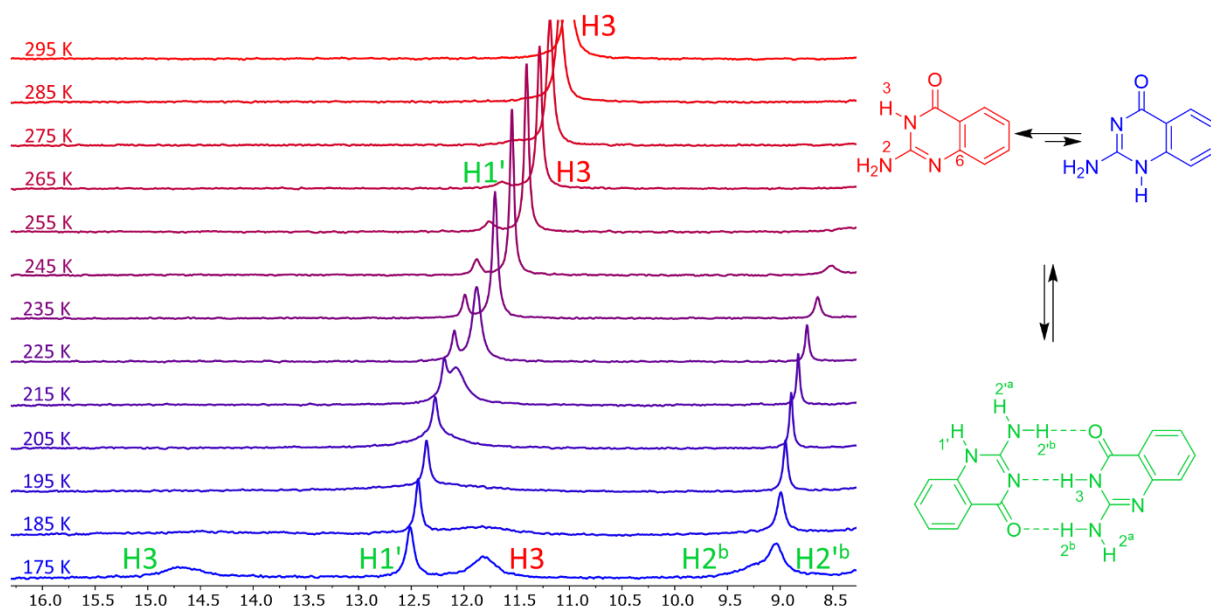

**Figure S5.** Low-field region of variable-temperature  $^1\text{H}$  NMR spectra of compound **16** in a 3:1 mixture of  $\text{DMF-}d_7$  and  $\text{CD}_2\text{Cl}_2$ .

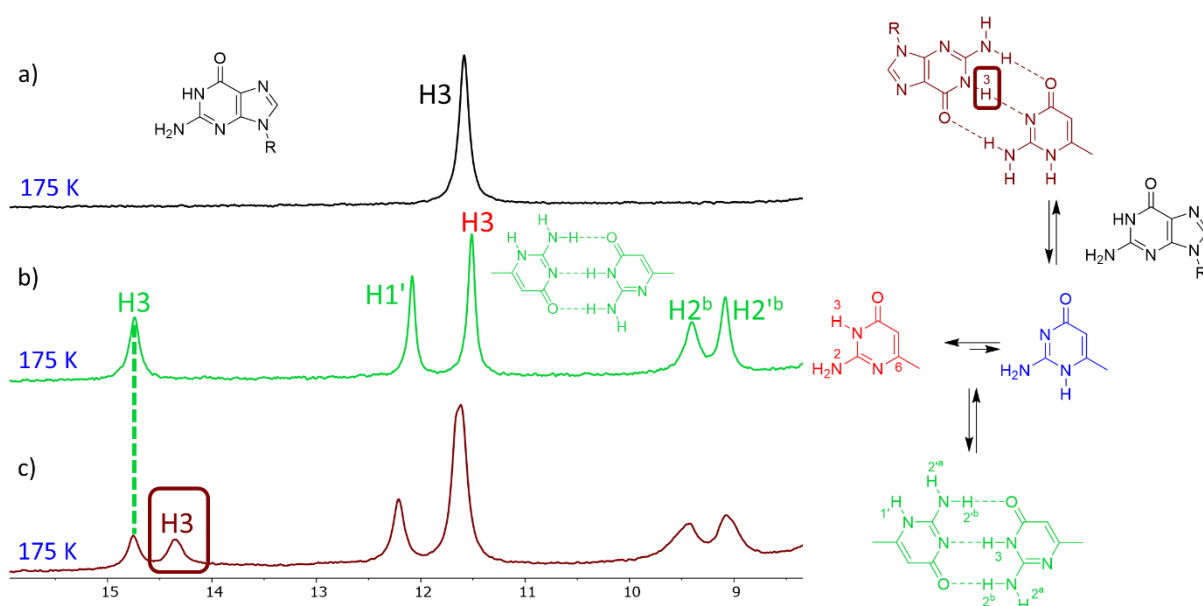

**Figure S6.** Low-field region of  $^1\text{H}$  NMR spectra of compound **18** (a), compound **7** (b) and their 1:1 mixture (c).

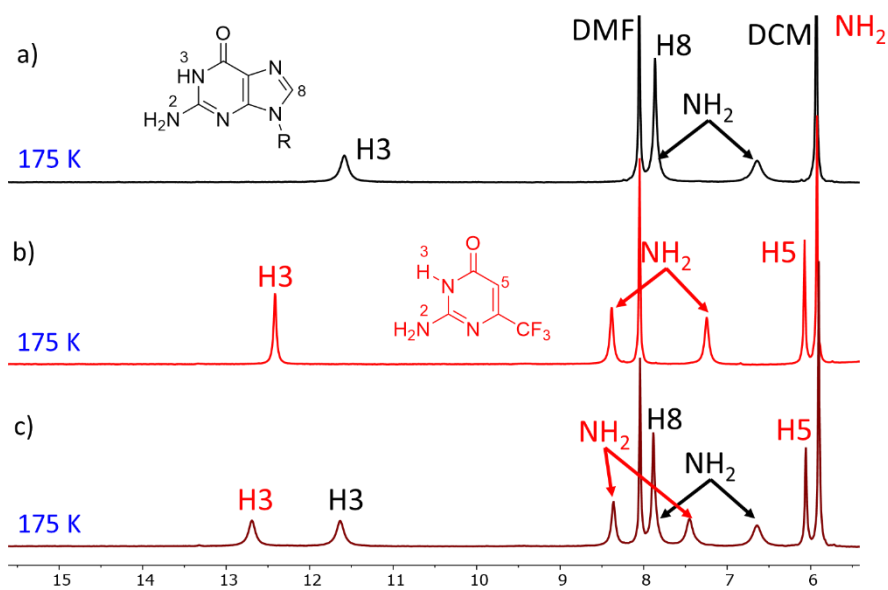

**Figure S7.** Low-field region of  $^1\text{H}$  NMR spectra of compound **18** (a), compound **10** (b) and their 1:1 mixture (c).

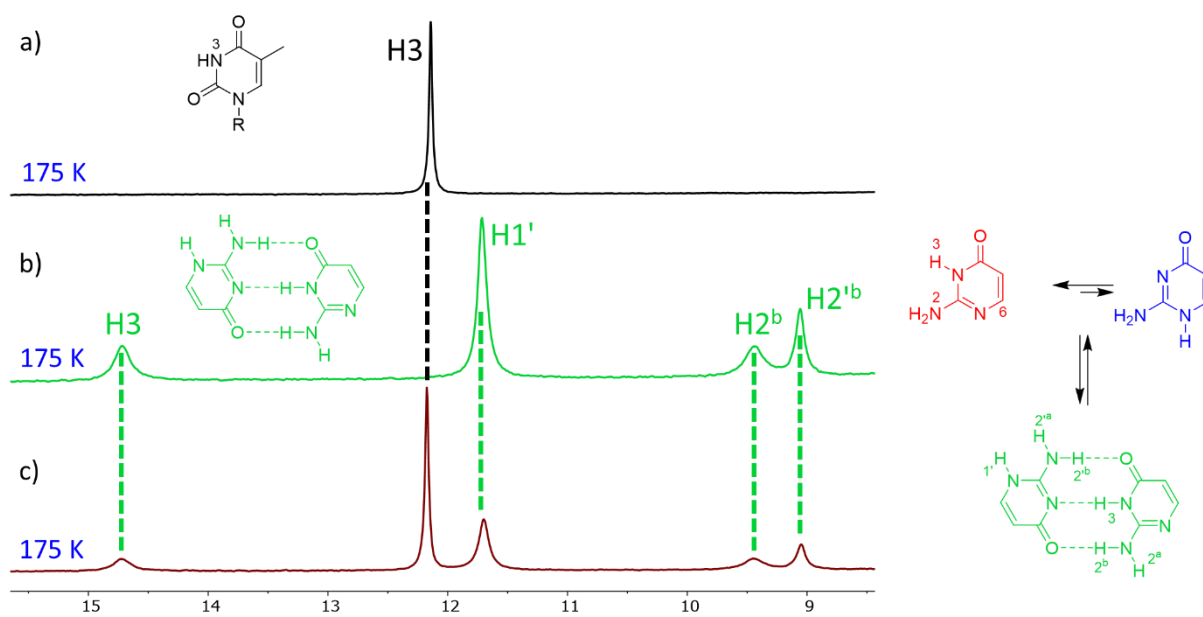

**Figure S8.** Low-field region of  $^1\text{H}$  NMR spectra of compound **1** (a), compound **T** (b) and their 1:1 mixture (c).

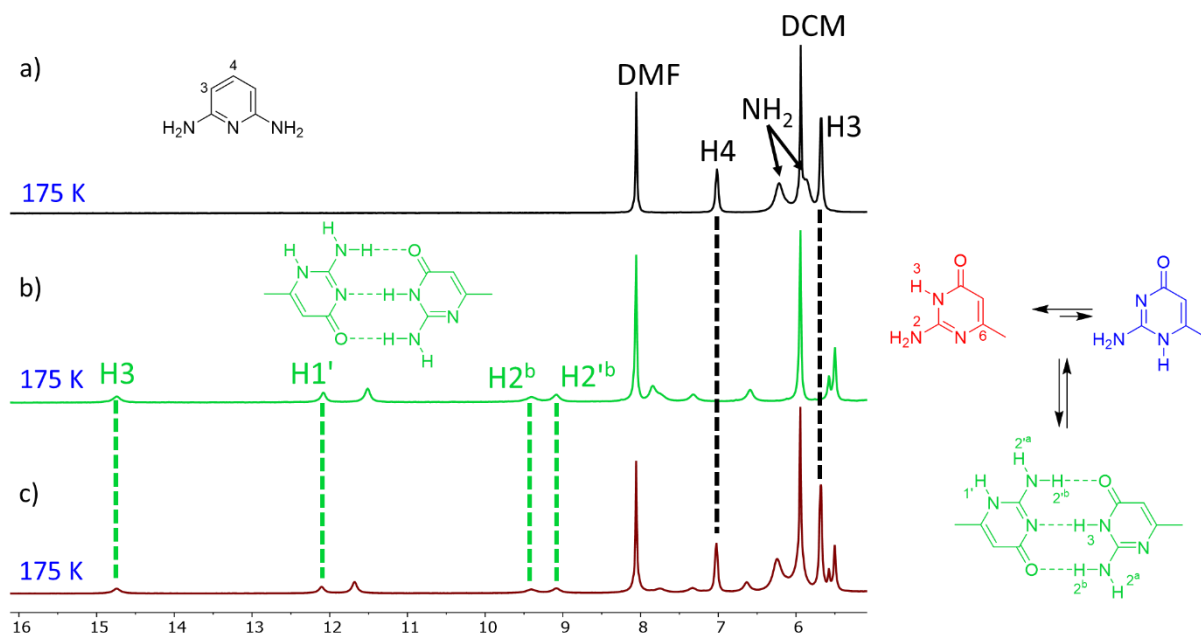

**Figure S9.** Low-field region of  $^1\text{H}$  NMR spectra of compound 7 (a), compound DAP (b) and their 1:1 mixture (c).
